# Supplementary material for: Transcriptome Analysis and Metabolic Profiling of Lycoris Radiata
Source: PubMed Central journal article supplement (PMC6784096; doi:10.3390/biology8030063), 2019-08-29
Supplement: biology-08-00063-s001.pdf [file biology-08-00063-s001.pdf]

# Supplementary Materials:

## Transcriptome Analysis and Metabolic Profiling of *Lycoris Radiata*

Chang Ha Park, Hyeon Ji Yeo, Ye Eun Park, Seung-A Baek, Jae Kwang Kim \* and Sang Un Park \*

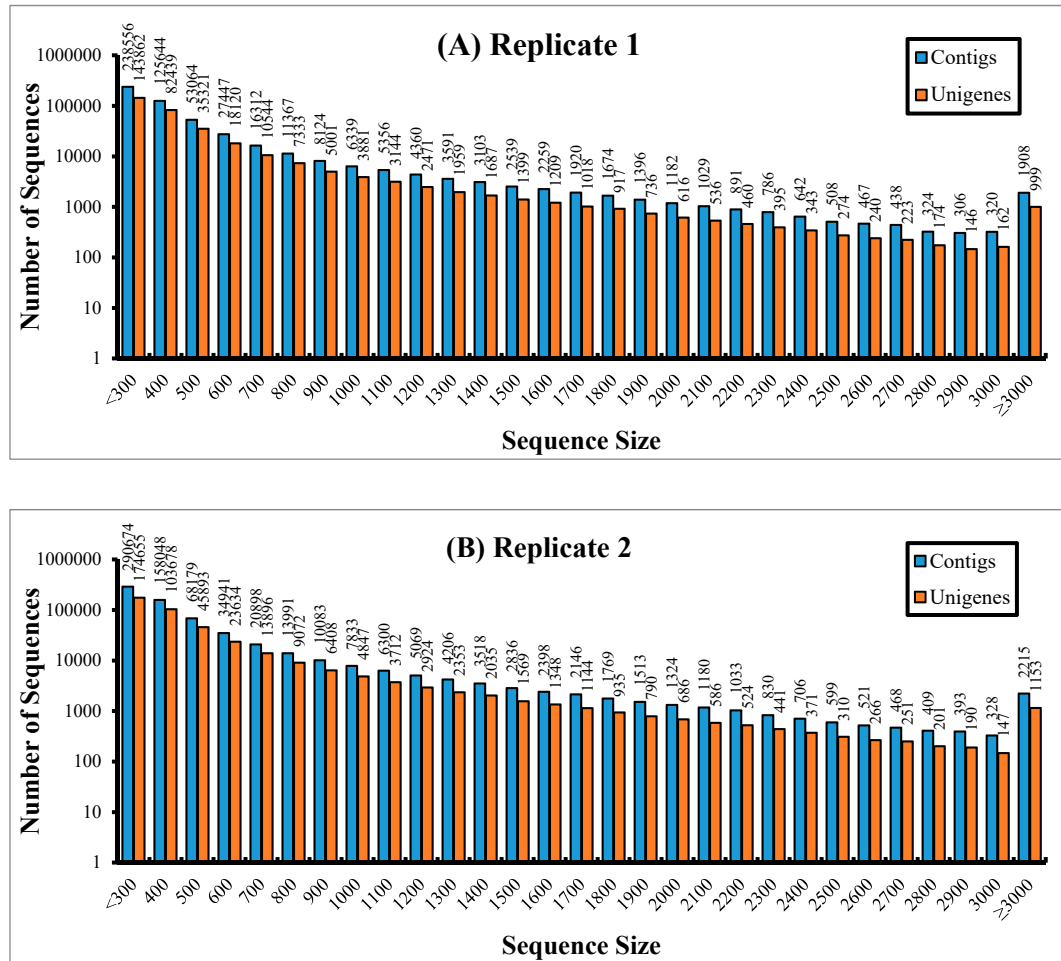

**Figure S1.** Length distribution of contigs and unigenes in the *L. radiata* transcriptome. (A) replicate 1, (B) replicate 2.

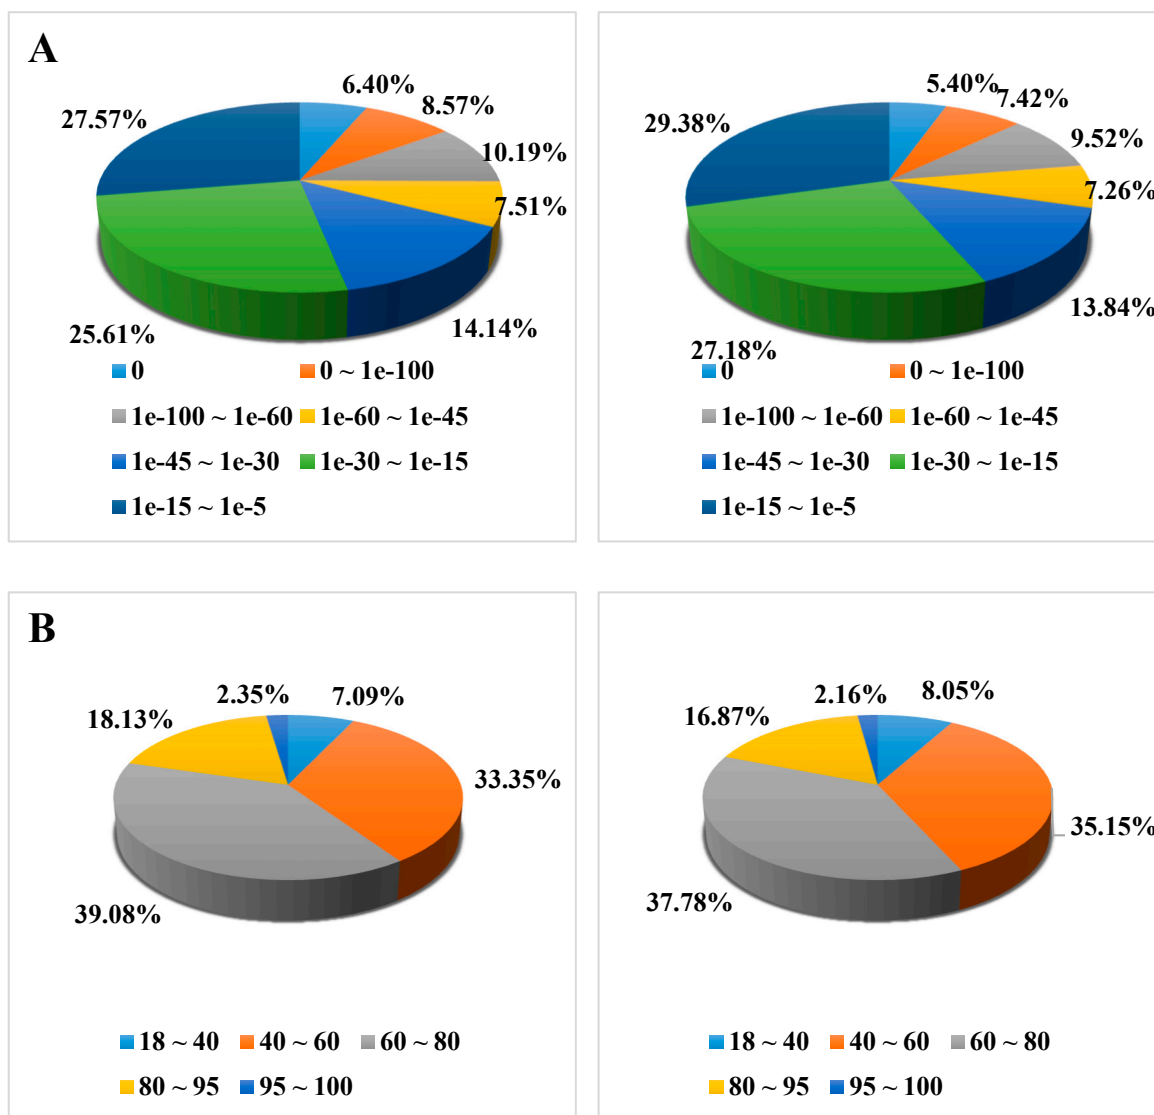

**Figure S2.** Classification of NR annotation results of the *L. radiata* unigenes. Left, Replicate 1; Right, Replicate 2; A. E-value distribution, B. Similarity distribution.

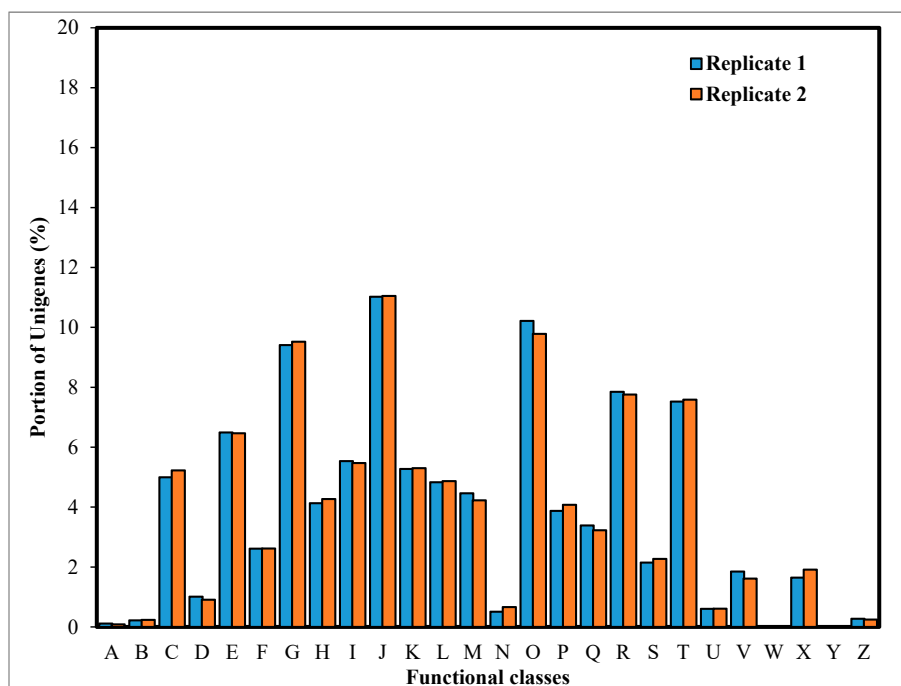

**Figure S3.** COG function classification of the *L. radiata* unigenes. A. RNA processing and modification, B. Chromatin Structure and dynamics, C. Energy production and conversion, D. Cell cycle control, cell division, chromosome partitioning, E. Amino acid transport and metabolism, F. Nucleotide transport and metabolism, G. Carbohydrate transport and metabolism, H. Coenzyme transport and metabolism, I. Lipid transport and metabolism, J. Translation, ribosomal structure and biogenesis, K. Transcription; L. Replication, recombination and repair, M. Cell wall/membrane/envelope biogenesis, N. Cell motility, O. Post-translational modification, protein turnover, chaperones, P. Inorganic ion transport and metabolism, Q. Secondary metabolite biosynthesis, transport and catabolism, R. General functional prediction only, S. Function unknown, T. Signal transduction mechanisms, U. Intracellular trafficking, secretion, and vesicular transport, V. Defense mechanisms, W. Extracellular structures, X. Phage-derived proteins, transposases and other, Y. Nuclear structure, and Z. Cytoskeleton.

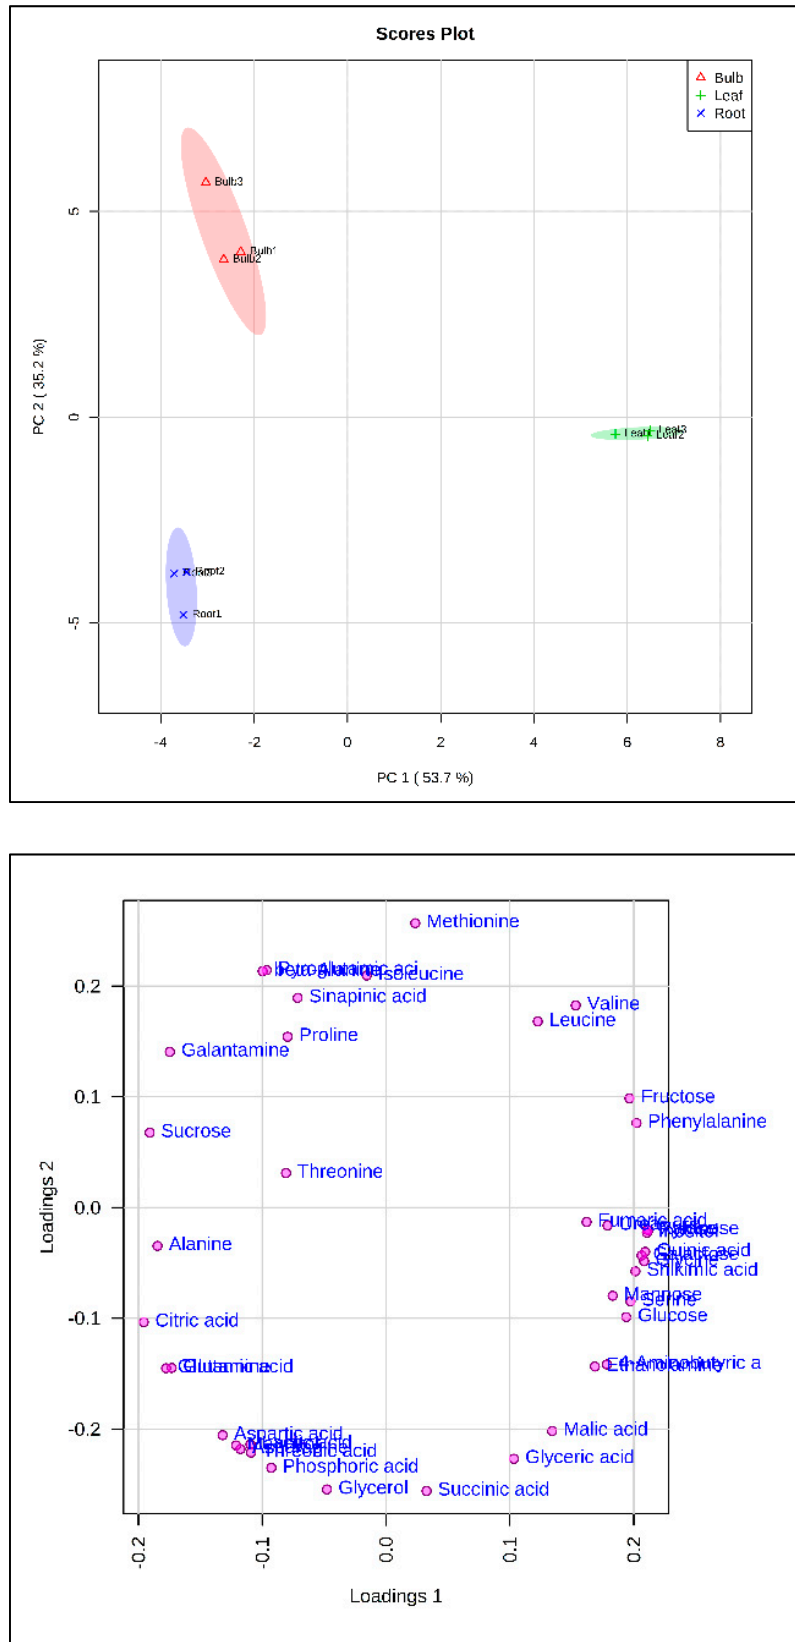

**Figure S4.** Principal component analysis results obtained from data on 40 metabolites for different organs of *L. radiata* grown in a growth chamber. Left, Score plot; Right, loading plot. PC 1, principal component 1; PC 2, principal component 2.

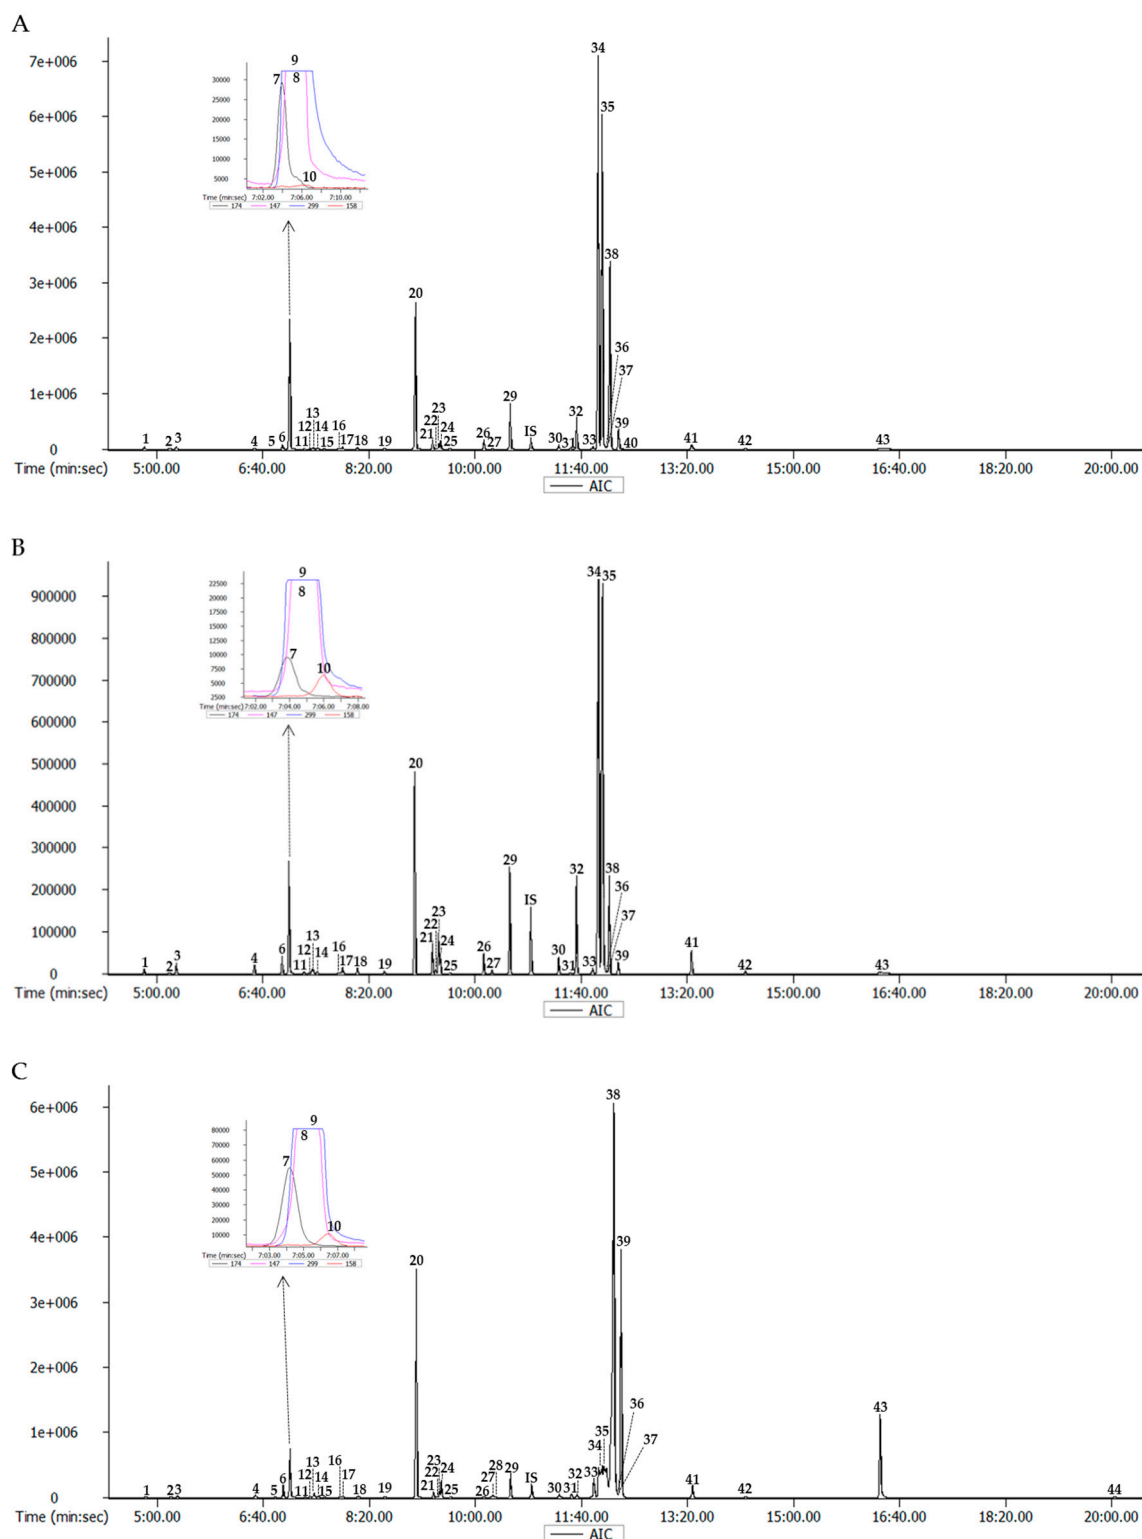

**Figure S5.** The chromatogram of metabolites obtained from root (A), bulb (B), and leaf (C) of *L. radiata* by using GC-TOFMS. Peak identification: 1, lactic acid; 2, valine-1; 3, alanine; 4, valine-2; 5, urea; 6, serine-1; 7, ethanolamine; 8, phosphoric acid; 9, glycerol; 10, leucine; 11, isoleucine; 12, proline; 13, glycine; 14, succinic acid; 15, glyceric acid; 16, fumaric acid; 17, serine-2; 18, threonine; 19,  $\beta$ -alanine; 20, malic acid; 21, aspartic acid; 22, methionine; 23, pyroglutamic acid; 24, 4-aminobutyric acid; 25, threonic acid; 26, glutamic acid; 27, phenylalanine; 28, xylose; 29, asparagine; 30, glutamine; 31, shikimic acid; 32, citric acid; 33, quinic acid; 34, fructose-1; 35, fructose-2; 36, mannose; 37, galactose; 38, glucose-1; 39, glucose-2; 40, mannitol; 41, inositol; 42, tryptophan; 43, sucrose; 44, raffinose; IS, internal standard (adonitol).

**Table S1.** Comparison of galantamine biosynthetic genes of *L. radiata* with the most orthologous genes and proteins.

| Genes<br>(Accession<br>no.)  | Plant species<br>Orthologous genes<br>(Accession no.)                       | Identity<br>(%) | Plant species<br>Orthologous proteins<br>(Accession no.)             | Identity<br>(%) |
|------------------------------|-----------------------------------------------------------------------------|-----------------|----------------------------------------------------------------------|-----------------|
| <i>LrPAL2</i><br>(MK690187)  | <i>Narcissus papyraceus</i><br>(MF979857.1)                                 | 93.99           | <i>Narcissus papyraceus</i><br>(AXU39893.1)                          | 95.48           |
|                              | <i>Narcissus pseudonarcissus</i><br>(MF405174.1)                            | 93.29           | <i>Narcissus pseudonarcissus</i><br>(AUG71935.1)                     | 93.70           |
|                              | <i>Narcissus papyraceus</i><br>(MF979858.1)                                 | 84.08           | <i>Narcissus papyraceus</i><br>(AXU39894.1)                          | 89.97           |
| <i>LrPAL3</i><br>(MK690188)  | <i>Narcissus papyraceus</i><br>(MF979858.1)                                 | 92.80           | <i>Narcissus papyraceus</i><br>(AXU39894.1)                          | 94.77           |
|                              | <i>Narcissus pseudonarcissus</i><br>(MF405174.1)                            | 83.51           | <i>Narcissus pseudonarcissus</i><br>(AUG71935.1)                     | 90.34           |
|                              | <i>Narcissus papyraceus</i><br>(MF979857.1)                                 | 82.52           | <i>Narcissus papyraceus</i><br>(AXU39893.1)                          | 89.83           |
| <i>LrC4H2</i><br>(MK690189)  | <i>Narcissus papyraceus</i><br>(MF979860.1)                                 | 95.59           | <i>Narcissus papyraceus</i><br>(AXU39896.1)                          | 97.23           |
|                              | <i>Narcissus papyraceus</i><br>(MF979859.1)                                 | 93.61           | <i>Narcissus papyraceus</i><br>(AXU39895.1)                          | 95.84           |
|                              | <i>Narcissus pseudonarcissus</i><br>(MF416091.1)                            | 92.68           | <i>Narcissus pseudonarcissus</i><br>(AUG71936.1)                     | 95.45           |
| <i>LrC3H</i><br>(MK690190)   | <i>Narcissus papyraceus</i><br>(KC455938.1)                                 | 96.12           | <i>Narcissus papyraceus</i><br>(AXU39897.1)                          | 97.53           |
|                              | <i>Narcissus pseudonarcissus</i><br>(KP337736.1)                            | 95.60           | <i>Narcissus pseudonarcissus</i><br>(AUG71937.1)                     | 95.74           |
|                              | <i>Narcissus tazetta cultivar</i><br><i>Jinzhanyintai</i><br>(AY987384.1)   | 93.36           | <i>Narcissus tazetta</i><br>(AGI97941.1)                             | 94.62           |
| <i>LrTYDC2</i><br>(MK690193) | <i>Narcissus pseudonarcissus</i><br>MF405172.1                              | 98.00           | <i>Narcissus pseudonarcissus</i><br>AUG71933.1                       | 98.76           |
|                              | <i>Narcissus papyraceus</i><br>MF979855.1                                   | 95.30           | <i>Narcissus papyraceus</i><br>(AXU39891.1)                          | 94.78           |
|                              |                                                                             |                 | <i>Asparagus officinalis</i><br>(XP_020265332.1)                     | 83.83           |
| <i>LrNNR</i><br>(MK690191)   | <i>Narcissus aff.</i><br><i>pseudonarcissus</i> MK-2014<br>(KU295569.1)     | 84.42           | <i>Narcissus pseudonarcissus</i><br>(AUG71944.1)                     | 82.14           |
|                              | <i>Narcissus pseudonarcissus</i><br>(MF416099.1)                            | 84.16           | <i>Narcissus papyraceus</i><br>(AXU39910.1)                          | 73.02           |
|                              | <i>Narcissus papyraceus</i><br>(MF979874.1)                                 | 78.27           | <i>Narcissus papyraceus</i><br>(AXU39908.1)                          | 70.63           |
| <i>LrN4OMT</i><br>(MK690192) | <i>Narcissus papyraceus</i><br>(MF979869.1)                                 | 98.19           | <i>Narcissus papyraceus</i><br>(AXU39905.1)                          | 96              |
|                              | <i>Narcissus pseudonarcissus</i><br>(MF416096.1)                            | 96.39           | <i>Narcissus sp. aff. pseudonarcissus</i><br>MK-2014<br>(AIL54542.1) | 95.82           |
|                              | <i>Narcissus sp. aff.</i><br><i>pseudonarcissus</i> MK-2014<br>(KJ584561.1) | 96.39           | <i>Narcissus pseudonarcissus</i><br>(AUG71941.1)                     | 95.40           |

|                        |                                                                   |       |                                                                              |       |
|------------------------|-------------------------------------------------------------------|-------|------------------------------------------------------------------------------|-------|
| LrCYP96T<br>(MK690194) | <i>Narcissus papyraceus</i><br>(MF979870.1)                       | 95.06 | <i>Narcissus papyraceus</i><br>(AXU39906.1)                                  | 94.92 |
|                        | <i>Narcissus sp. aff. pseudonarcissus</i><br>MK-2014 (KT693312.1) | 93.41 | <i>Narcissus sp. aff. pseudonarcissus</i><br>MK-2014 CYP96T2<br>(AMO65742.1) | 93.37 |
|                        | <i>Narcissus pseudonarcissus</i><br>(MF416098.1)                  | 93.28 | <i>Narcissus papyraceus</i><br>(AXU39907.1)                                  | 91.60 |

**Table S2.** Primers for genes in the galantamine biosynthesis pathway.

| Genes         | Sequence of forward primer<br>(5'-3') | Sequence of reverse primer<br>(5'-3') |
|---------------|---------------------------------------|---------------------------------------|
| <i>PAL2</i>   | GGGCTACCATCAAATCTCTC                  | CATCTTGGTTGTGTGTTGTTCC                |
| <i>PAL3</i>   | GCAAACACTTCCATCTTCCAA                 | GCTCTTCTCTCACAAACCGA                  |
| <i>C4H2</i>   | AGTCGCTTCTCGCCGTATTC                  | AGGTTGCGGTGGTTGAG                     |
| <i>C3H</i>    | GACCACCTCAACATCGT                     | GCAGACCTTCTCACCTT                     |
| <i>NNR</i>    | CGTTTGTGGAGGATAAGGA                   | AGTGATGTAGGAAGCAGATG                  |
| <i>N4OMT</i>  | GCTGAGGGAGGTGACTGA                    | ATTGCCGTTATCTTCCATCTTC                |
| <i>TYDC2</i>  | TTTGCCAGAAATACCGACA                   | AGAGCAGGGAGCAATCAAAG                  |
| <i>CYP96T</i> | CGATGCCGTGTCTTTCTAC                   | GGATTGCGTGTCTTCTCTGC                  |
| <i>ACTIN</i>  | AGGAATGGGTCAAAGGATGC                  | TTGGCTTTCGGGTTTCAGAG                  |

**Table S3.** Summary of annotations of the *L. radiata* unigenes.

|                                     | Replicate I      |           | Replicate II     |           |
|-------------------------------------|------------------|-----------|------------------|-----------|
|                                     | BLASTed unigenes | Ratio (%) | BLASTed unigenes | Ratio (%) |
| All unigenes                        | 325,609          | 100       | 404,019          | 100       |
| Unigenes BLASTed against NR         | 82,263           | 25.26     | 91,717           | 22.7      |
| Unigenes BLASTed against NT         | 21,257           | 6.53      | 22,961           | 5.68      |
| Unigenes BLASTed against SWISS-PROT | 53,960           | 16.57     | 60,706           | 15.03     |
| Unigenes BLASTed against TAIR       | 59,051           | 18.14     | 65,053           | 16.1      |
| Unigenes BLASTed against COG        | 15,559           | 4.78      | 16,206           | 4.01      |
| Unigenes BLASTed against GO         | 53,213           | 16.34     | 59,892           | 14.82     |
| Unigenes CDS predicted              | 63,816           | 19.6      | 70,096           | 17.35     |
| All annotated coding unigenes       | 120,043          | 36.87     | 136,649          | 33.82     |

**Table S4.** Metabolite peak height differences of root, bulb, and leaf of *L. radiata* using GC-TOFMS. N.D., not detected.

|              | Metabolites     | Root            | Bulb          | Leaf           |
|--------------|-----------------|-----------------|---------------|----------------|
| Organic acid | Lactic acid     | 17.29 ± 2.45    | 8.17 ± 0.68   | 8.40 ± 1.68    |
|              | Urea            | N.D.            | N.D.          | 0.16 ± 0.09    |
|              | Phosphoric acid | 1156.78 ± 42.88 | 168.48 ± 5.76 | 332.70 ± 16.92 |
|              | Threonic acid   | 7.04 ± 0.70     | 2.50 ± 0.26   | 2.81 ± 0.12    |
|              | Shikimic acid   | 7.46 ± 0.30     | 2.38 ± 0.42   | 33.70 ± 6.81   |
| Amino acid   | Valine          | 3.67 ± 0.75     | 15.01 ± 1.02  | 18.10 ± 0.78   |
|              | Alanine         | 17.86 ± 2.30    | 16.10 ± 1.08  | 11.62 ± 1.44   |
|              | Serine          | 57.92 ± 1.64    | 36.80 ± 1.75  | 117.28 ± 9.99  |
|              | Leucine         | 0.87 ± 0.41     | 3.01 ± 1.69   | 3.61 ± 0.36    |
|              | Isoleucine      | 1.00 ± 0.60     | 4.40 ± 2.93   | 2.25 ± 0.19    |

|                                       |                     |                  |                   |                    |
|---------------------------------------|---------------------|------------------|-------------------|--------------------|
|                                       | Proline             | 0.69 ± 0.44      | 2.16 ± 2.27       | 0.33 ± 0.09        |
|                                       | Glycine             | 9.29 ± 0.28      | 6.65 ± 0.21       | 28.47 ± 1.38       |
|                                       | Threonine           | 7.91 ± 1.13      | 7.89 ± 2.83       | 6.33 ± 2.37        |
|                                       | beta-Alanine        | 2.90 ± 0.23      | 3.99 ± 0.49       | 2.78 ± 0.09        |
|                                       | Aspartic acid       | 49.28 ± 2.05     | 29.46 ± 0.74      | 27.83 ± 1.01       |
|                                       | Methionine          | 1.75 ± 0.07      | 6.41 ± 0.27       | 4.19 ± 0.45        |
|                                       | Pyroglutamic acid   | 42.09 ± 5.47     | 73.27 ± 5.57      | 40.25 ± 4.81       |
|                                       | 4-Aminobutyric acid | 63.97 ± 3.10     | 26.43 ± 1.15      | 105.99 ± 1.14      |
|                                       | Glutamic acid       | 71.91 ± 2.45     | 28.96 ± 1.62      | 2.90 ± 0.22        |
|                                       | Phenylalanine       | 6.29 ± 0.12      | 8.45 ± 0.11       | 12.02 ± 0.70       |
|                                       | Asparagine          | 357.61 ± 27.79   | 149.74 ± 28.00    | 150.52 ± 5.21      |
|                                       | Glutamine           | 32.34 ± 0.83     | 23.17 ± 2.26      | 17.44 ± 2.28       |
| <b>Phenolic acid</b>                  | Quinic acid         | 21.15 ± 1.24     | 8.98 ± 0.69       | 153.58 ± 13.34     |
|                                       | Sinapinic acid      | N.D.             | 0.48 ± 0.31       | N.D.               |
| <b>Photorespiration intermediates</b> | Glyceric acid       | 3.01 ± 0.24      | 0.00 ± 0.00       | 3.26 ± 0.14        |
|                                       | Ethanolamine        | 15.55 ± 2.03     | 5.10 ± 1.45       | 25.25 ± 2.88       |
| <b>TCA cycle intermediates</b>        | Succinic acid       | 9.38 ± 0.53      | 3.95 ± 0.32       | 7.82 ± 0.34        |
|                                       | Fumaric acid        | 1.39 ± 0.51      | 1.56 ± 1.10       | 3.36 ± 1.05        |
|                                       | Malic acid          | 1191.73 ± 46.05  | 297.32 ± 19.12    | 1492.63 ± 42.05    |
|                                       | Citric acid         | 251.19 ± 8.73    | 144.27 ± 5.10     | 20.72 ± 0.48       |
|                                       | Xylose              | N.D.             | N.D.              | 0.20 ± 0.00        |
| <b>Carbohydrates</b>                  | Fructose            | 4348.55 ± 308.32 | 10144.22 ± 503.24 | 17026.43 ± 1165.01 |
|                                       | Mannose             | 4.16 ± 0.33      | 2.90 ± 0.73       | 7.89 ± 2.20        |
|                                       | Galactose           | 3.34 ± 0.53      | 1.13 ± 0.30       | 23.53 ± 4.87       |
|                                       | Glucose             | 867.70 ± 80.44   | 129.20 ± 11.80    | 2479.09 ± 365.35   |
|                                       | Mannitol            | 1.88 ± 0.10      | N.D.              | N.D.               |
|                                       | Inositol            | 36.84 ± 2.03     | 36.61 ± 2.07      | 93.44 ± 9.19       |
|                                       | Sucrose             | 1745.01 ± 111.16 | 1996.55 ± 496.96  | 724.40 ± 20.03     |
|                                       | Raffinose           | N.D.             | N.D.              | 1.79 ± 0.27        |
|                                       | Glycerol            | 257.22 ± 15.59   | 69.23 ± 3.06      | 139.82 ± 4.09      |
